# Supplementary material
Source: publisher figshare collection journal article supplement (https://sage.figshare.com/ndownloader/files/24789567)

24/9/2018

To Whom It May Concern

I give permission to Carol Thake to use the attached images as illustrations in her research article in HERD: Health Environments Research and Design Journal.



David Renn

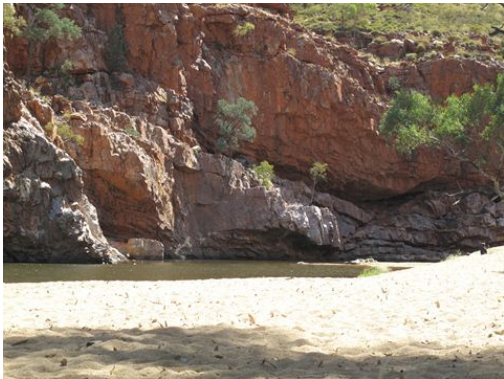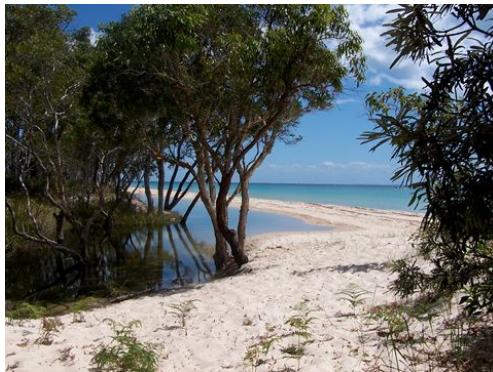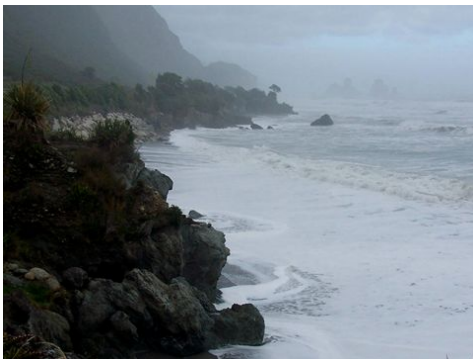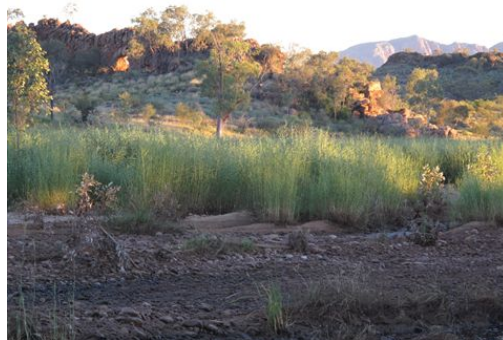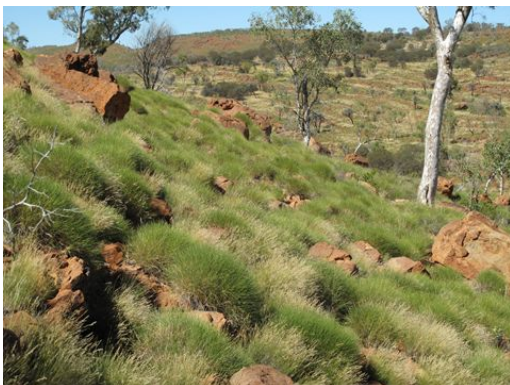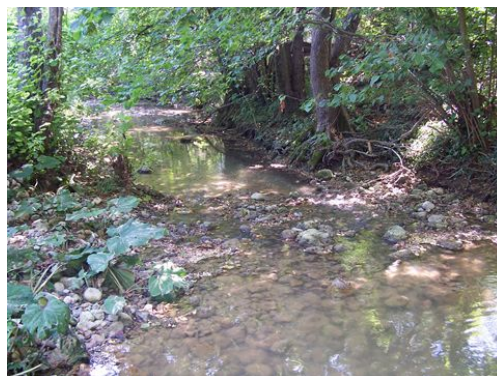

Supplement: Supplementary file 1 [file 24789567]
